# Supplementary material
Source: Springer Nature journal article supplement (https://www.springermedizin.de/resource/supplementary/13069_2011_62_MOESM1_ESM.pdf/9659702)

CCR2

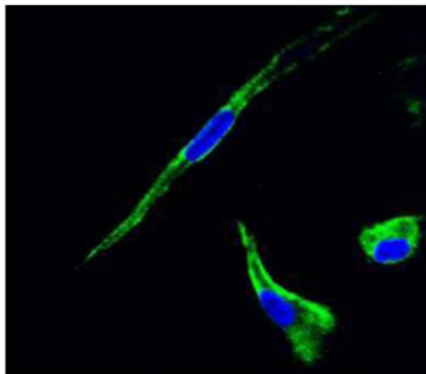

CD45

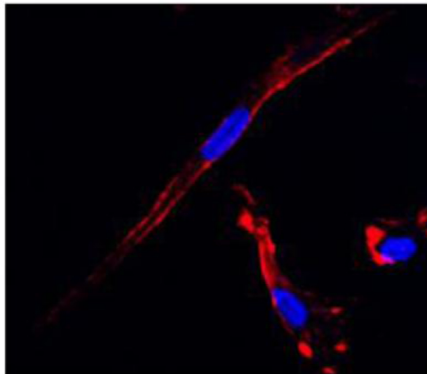

CCR2 & CD45

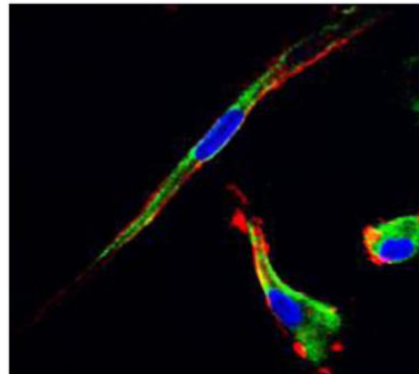

Chicken IgY

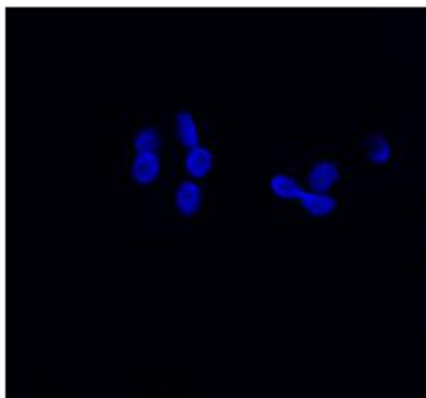

Murine IgG<sub>1</sub>

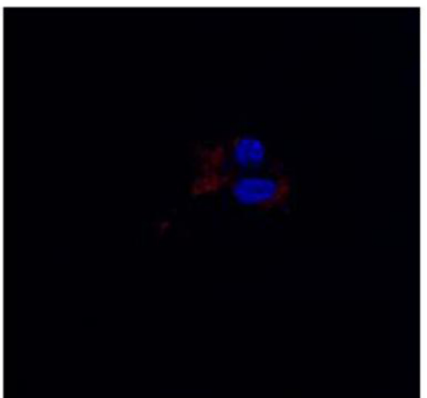

Supplement: MOESM1 [file 9659702]
